# Supplementary material for: Facilitators and barriers to using virtual reality and augmented reality and its impact on social engagement in aged care settings: a scoping review protocol
Source: HighWire-hosted journal article supplement (doi:10.1136/bmjopen-2022-061722), 2022-08-01
Supplement: bmjopen-2022-061722supp001_data_supplement.pdf [file bmjopen-2022-061722supp001_data_supplement.pdf]

**Supplemental file 1: Inclusion and exclusion criteria**

| <b>Inclusion Criteria</b>                                                                                                                                                        | <b>Exclusion Criteria</b>                                                                                                                                                                    |
|----------------------------------------------------------------------------------------------------------------------------------------------------------------------------------|----------------------------------------------------------------------------------------------------------------------------------------------------------------------------------------------|
| Articles that include users who are aged 65 or older                                                                                                                             | Articles with a focus on users who are less than 65 years old                                                                                                                                |
| Articles focused on immersive virtual reality and/or augmented reality technology                                                                                                | Articles that are not focused on virtual reality and/or augmented reality technology; non-immersive types of virtual reality and/or augmented reality will not be considered.                |
| Articles with a focus on a healthcare setting with formal care provided by paid staff                                                                                            | Articles that focus on settings without formal care (e.g., home care)                                                                                                                        |
| Articles address at least one of the following areas of adopting virtual reality and/or augmented reality: barriers, facilitators, impact on social engagement and/or loneliness | Articles that do not address at least one of the following areas of adopting virtual reality and/or augmented reality: barriers, facilitators, impact on social engagement and/or loneliness |
| Peer reviewed journal articles, full reports, case studies, user reports; grey literature                                                                                        | Only abstracts available                                                                                                                                                                     |
| Publications in English                                                                                                                                                          | Non-English publications                                                                                                                                                                     |
| Articles published within the last five years (2017-2022)                                                                                                                        | Articles published before 2017                                                                                                                                                               |
