# Supplementary material for: Facilitators and barriers to using virtual reality and augmented reality and its impact on social engagement in aged care settings: a scoping review protocol
Source: HighWire-hosted journal article supplement (doi:10.1136/bmjopen-2022-061722), 2022-08-01
Supplement: bmjopen-2022-061722supp002_data_supplement.pdf [file bmjopen-2022-061722supp002_data_supplement.pdf]

**Supplemental file 2: Preliminary search (CINAHL)**

|     |                                                                                                                                                                                                                                 |
|-----|---------------------------------------------------------------------------------------------------------------------------------------------------------------------------------------------------------------------------------|
| S1  | (MH "Aged+") OR (MH "Geriatrics")                                                                                                                                                                                               |
| S2  | TI ("older adult*" or elder* or geriatric* or aging or aged or senior* or "older people*") OR AB ("older adult*" or elder* or geriatric* or aging or aged or senior* or "older people*")                                        |
| S3  | S1 OR S2                                                                                                                                                                                                                        |
| S4  | (MH "Residential Facilities+")                                                                                                                                                                                                  |
| S5  | TI ("residential facilit*" or "nursing home*" or "long term care" or "long-term care" or "homes of the aged") OR AB ("residential facilit*" or "nursing home*" or "long term care" or "long-term care" or "homes of the aged" ) |
| S6  | S4 OR S5                                                                                                                                                                                                                        |
| S7  | (MH "Virtual Reality+") OR (MH "Augmented Reality")                                                                                                                                                                             |
| S8  | TI ("virtual realit*" or "augmented realit*") OR AB ("virtual realit*" or "augmented realit*")                                                                                                                                  |
| S9  | S7 OR S8                                                                                                                                                                                                                        |
| S10 | S3 AND S6 AND S9                                                                                                                                                                                                                |
